# Supplementary material for: Grindstone Chemistry: Design, One-Pot Synthesis, and Promising Anticancer Activity of Spiro[acridine-9,2′-indoline]-1,3,8-trione Derivatives against the MCF-7 Cancer Cell Line
Source: MDPI journal article supplement (doi:10.3390/molecules25245862), 2020-12-11

*Supporting Information*

# Grindstone chemistry: Design, one-pot synthesis and promising anticancer activity of spiro[acridine-9,2'-indoline]-1,3,8-trione derivatives against MCF-7 cancer cell line

PerumalGobinath<sup>1</sup>, PonnusamyPackialakshmi<sup>1</sup>, Daoud Ali<sup>2</sup>, Saud alarifi<sup>2</sup>, Akbar Idhayadhulla<sup>1</sup>, and SurendrakumarRadhakrishnan<sup>1\*</sup>

## Content

|                                              |       |
|----------------------------------------------|-------|
| <sup>1</sup> H-NMR Spectrum of compound-     | 2-11  |
| <sup>13</sup> C-NMR Spectrum of the compound | 12-21 |

<sup>1</sup>H-NMR

Compound **1a**

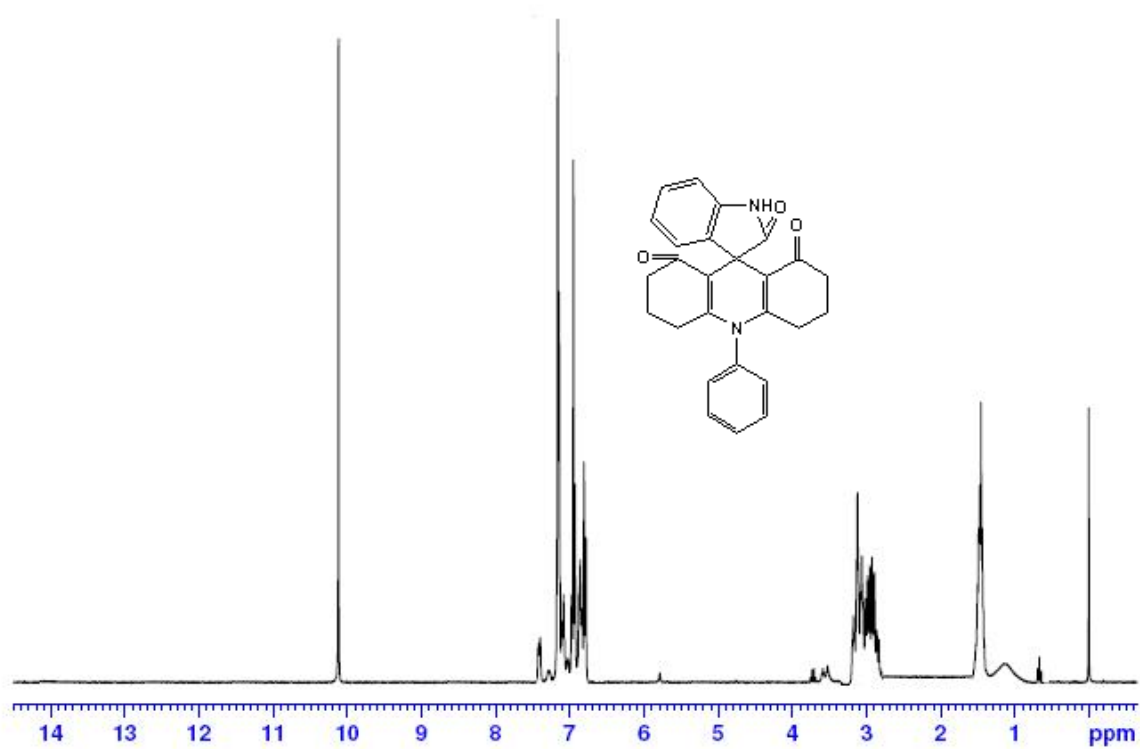

Compound **1b**

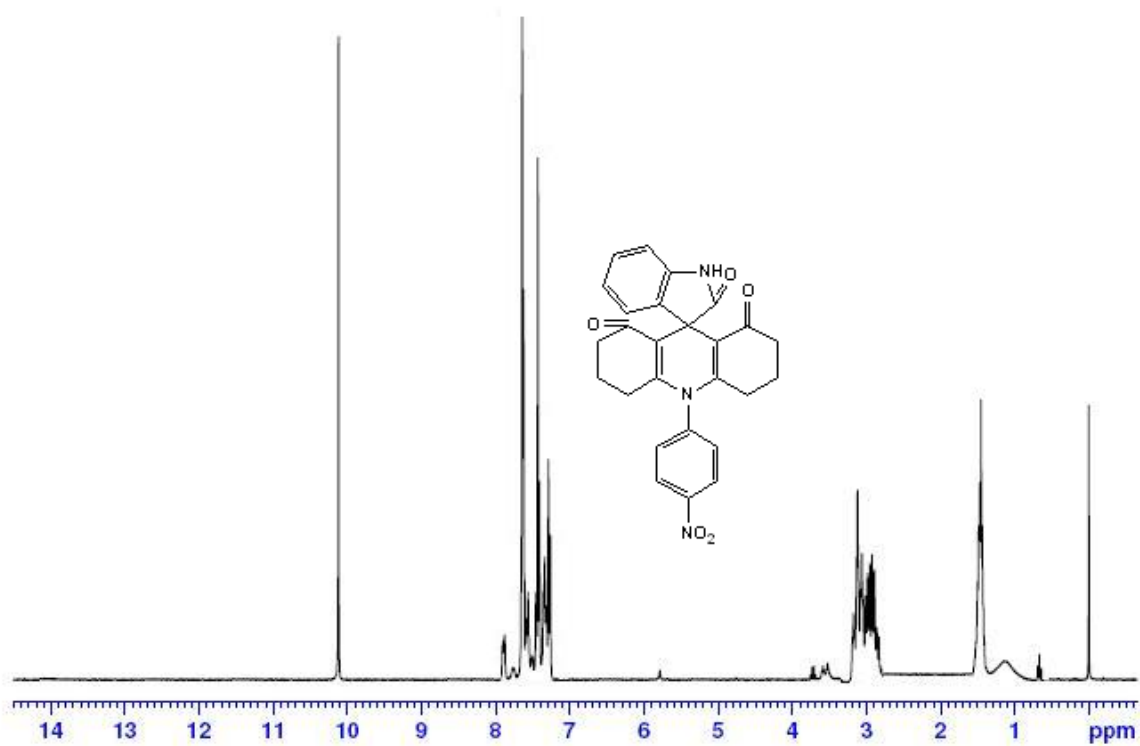

Compound **1c**

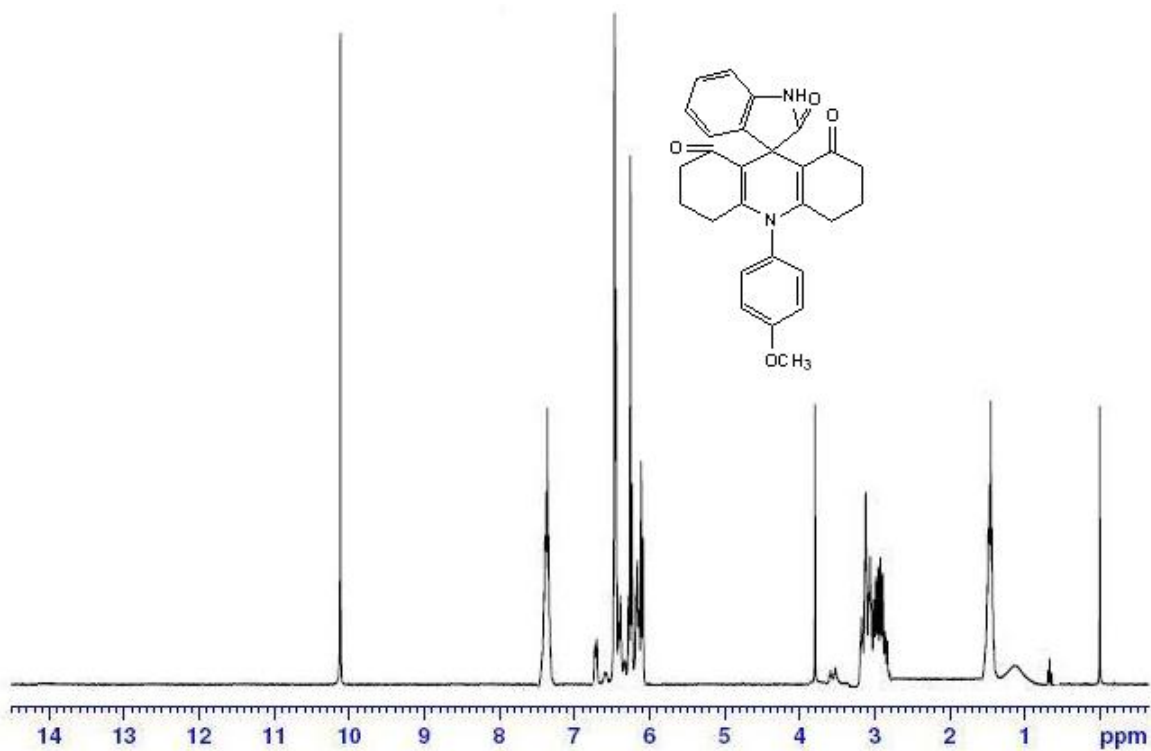

Compound 1d

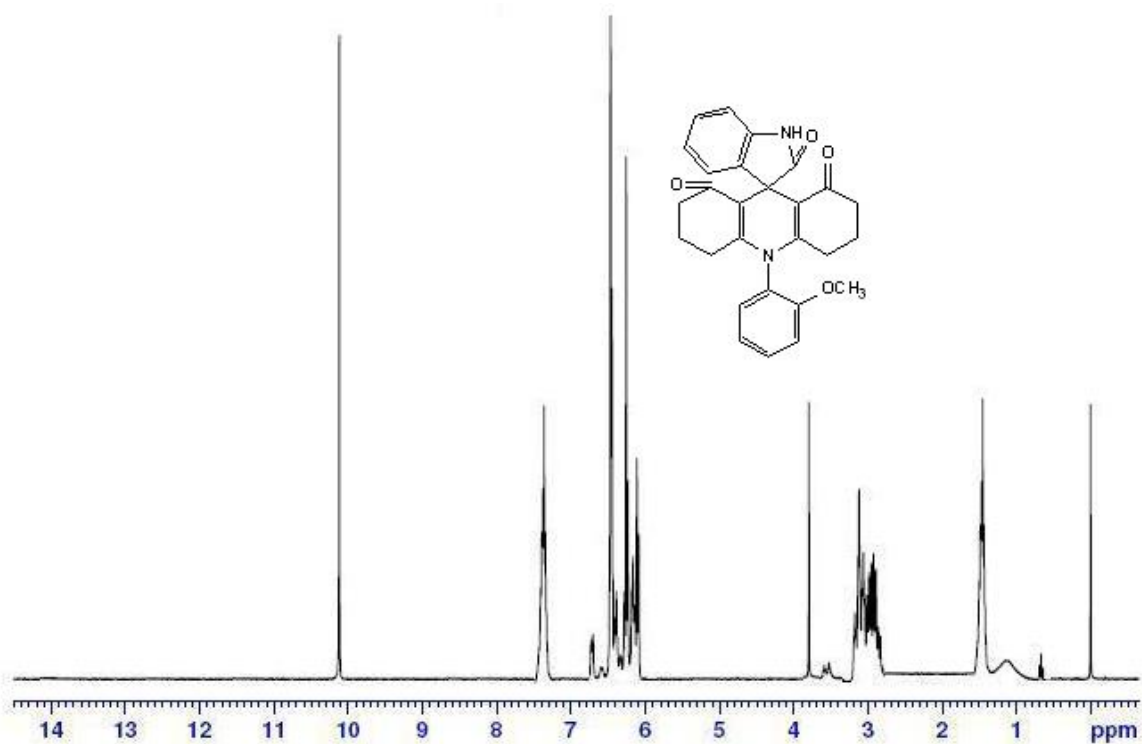

Compound **1e**

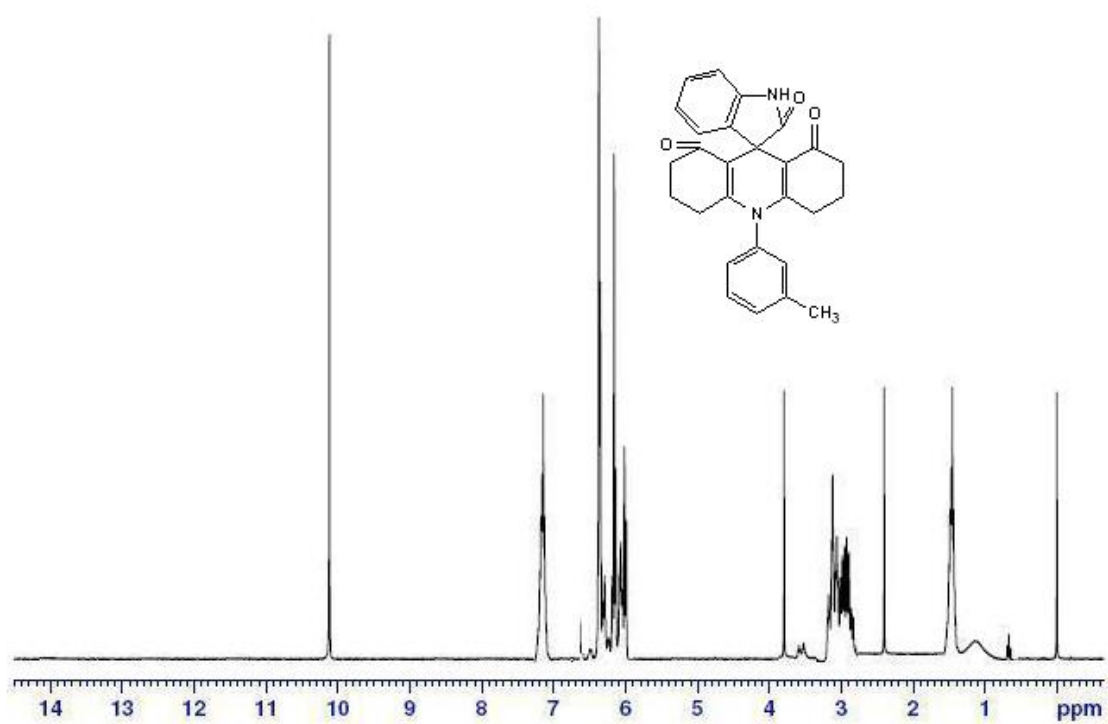

Compound **1f**

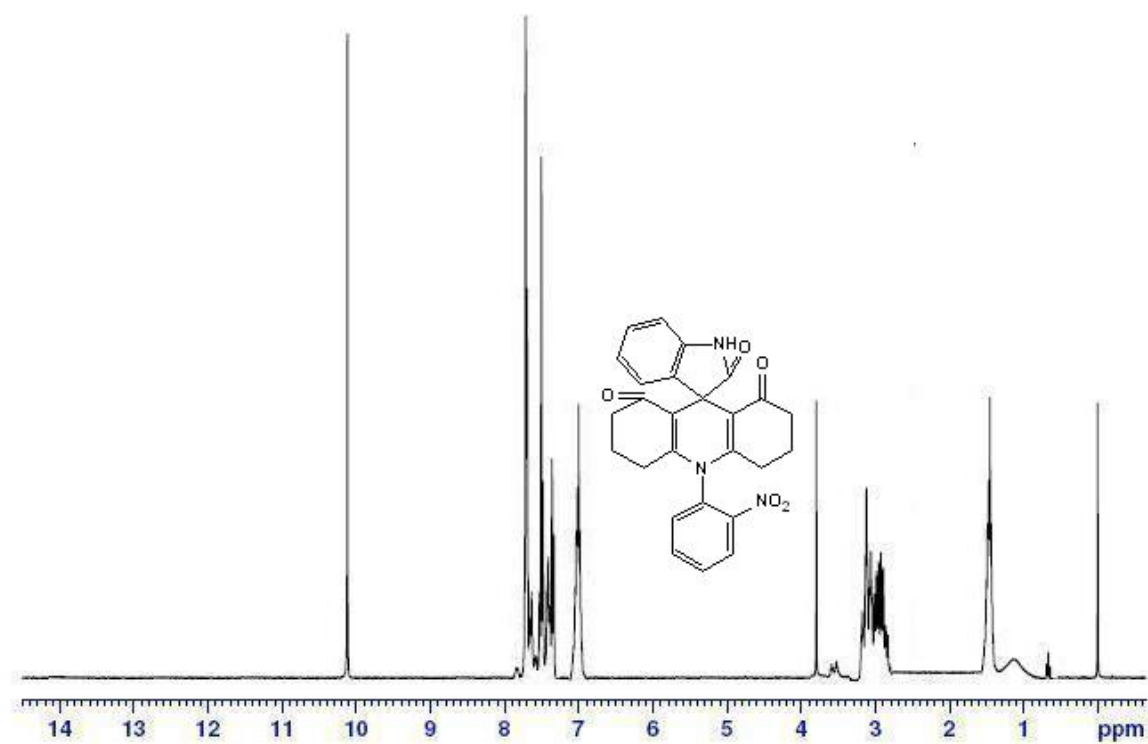

Compound **1g**

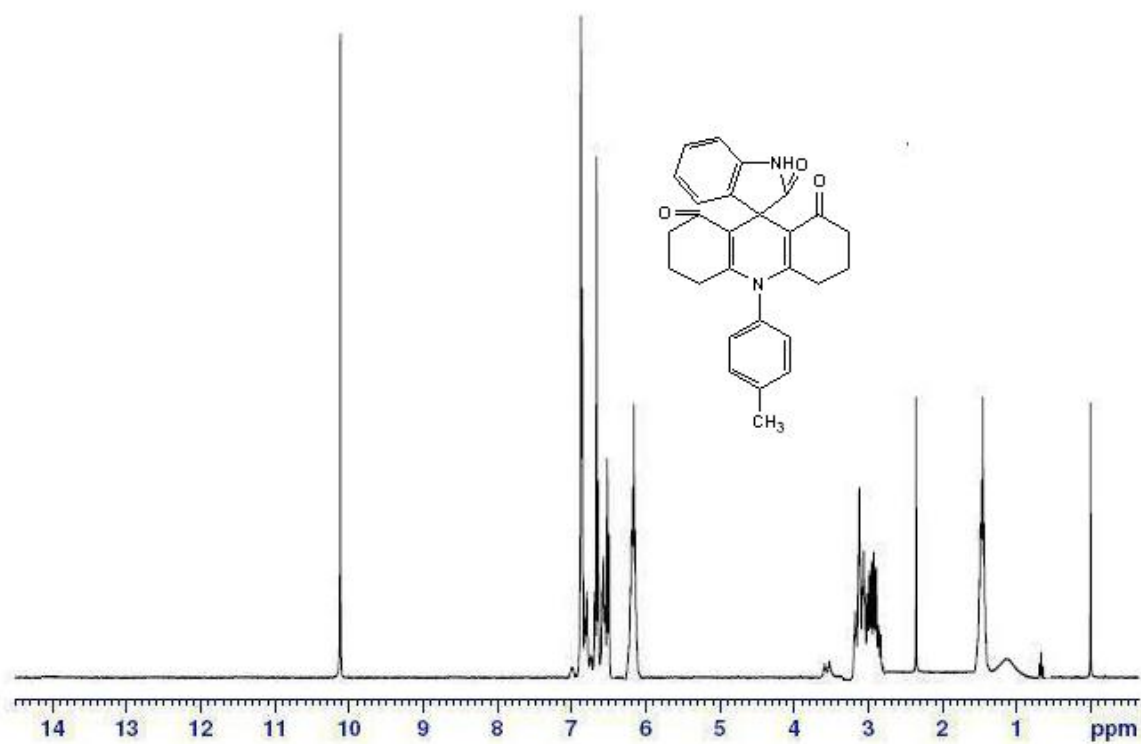



Compound **1h**

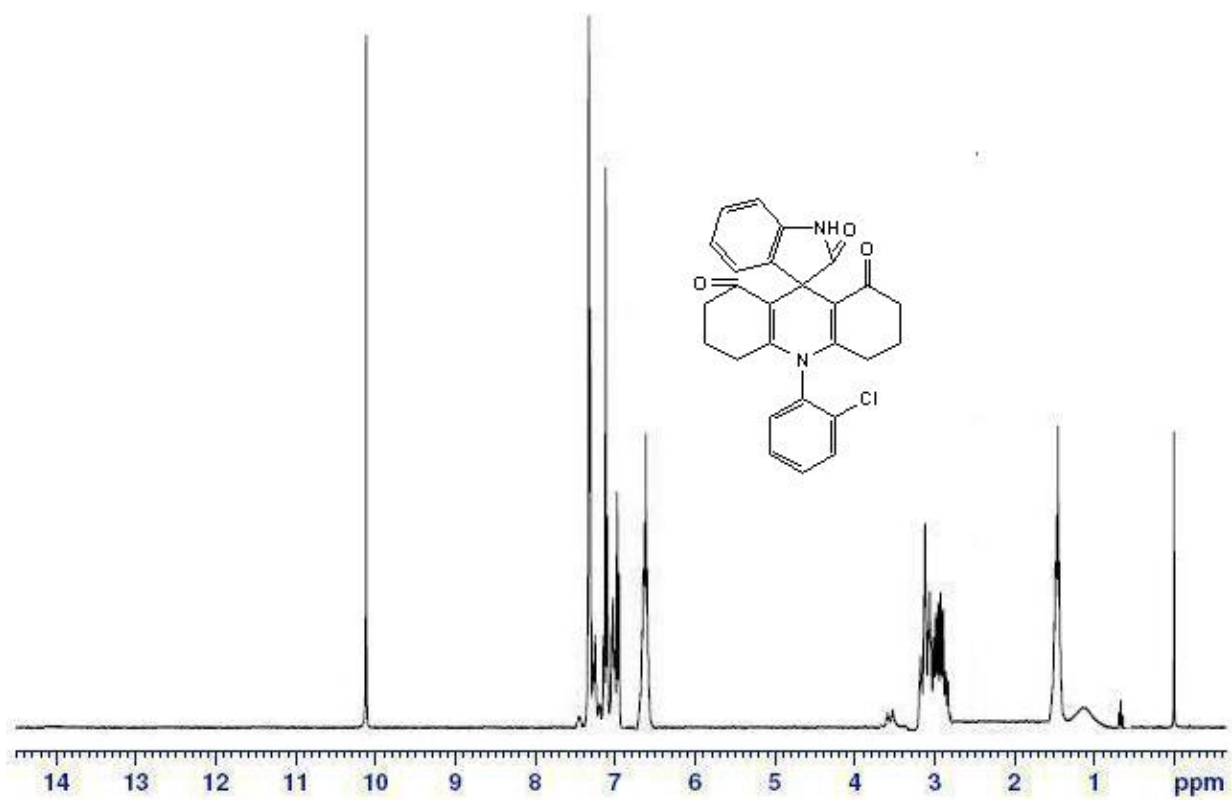

Compound **1i**

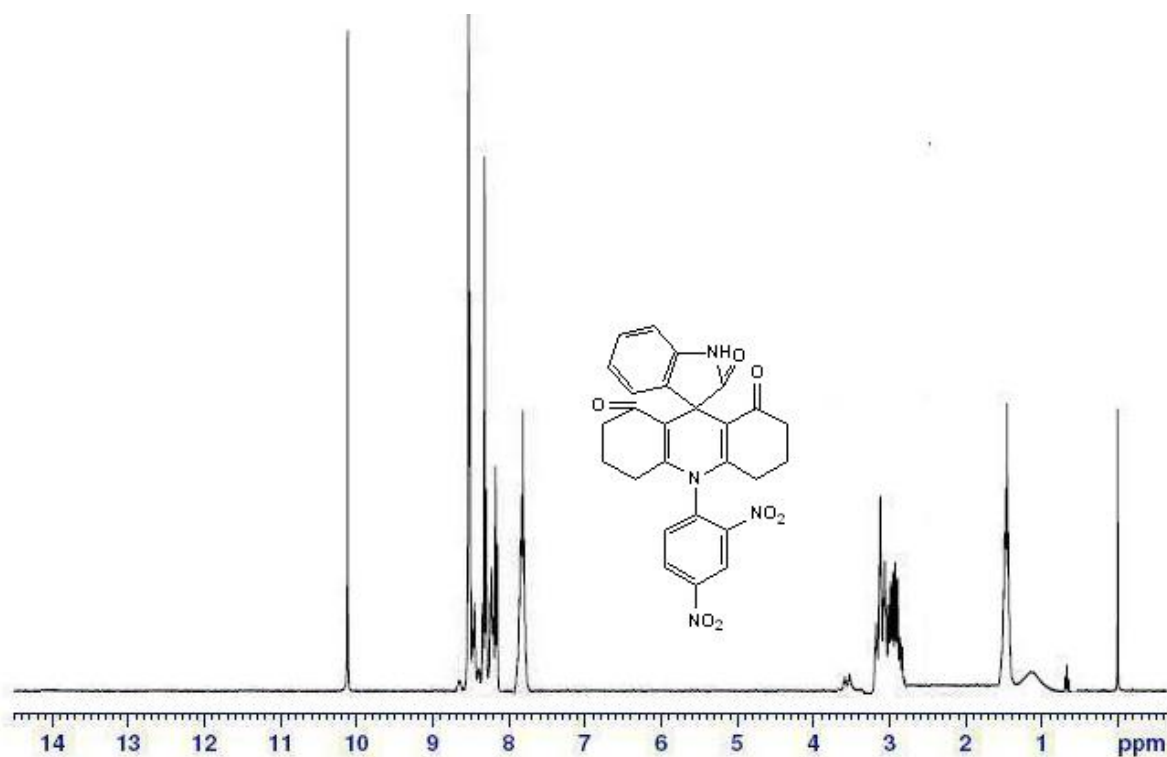

Compound 1j

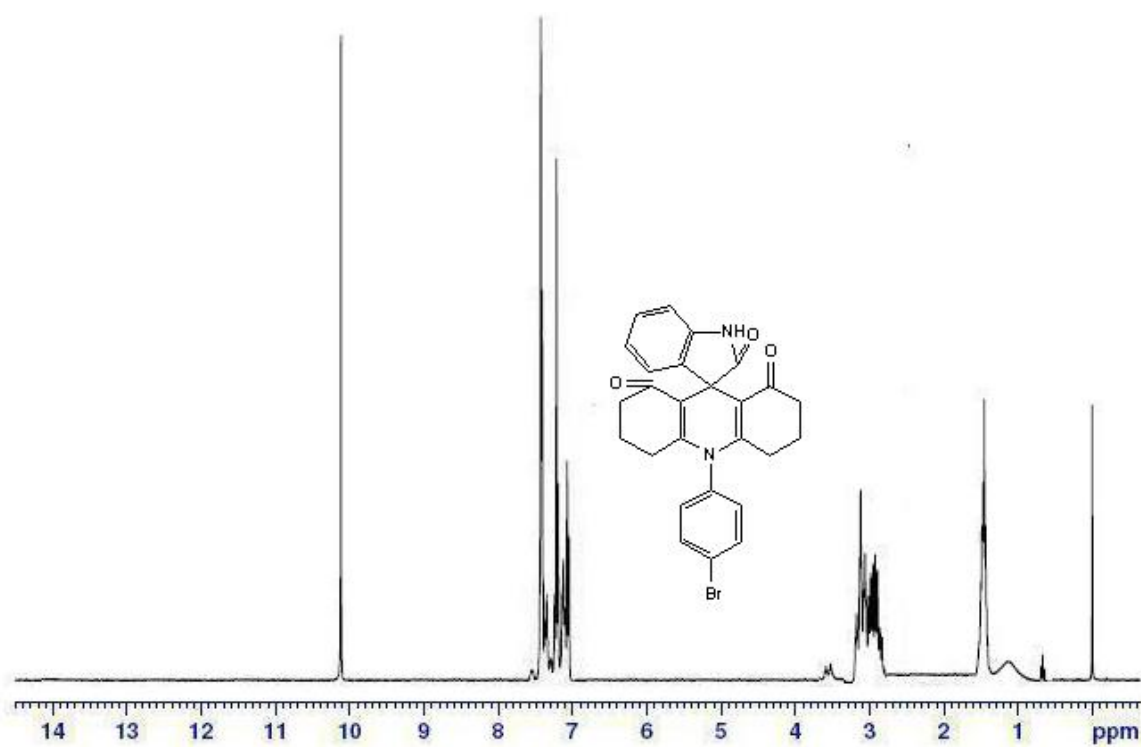

$^{13}\text{C}$ -NMR

Compound-1a

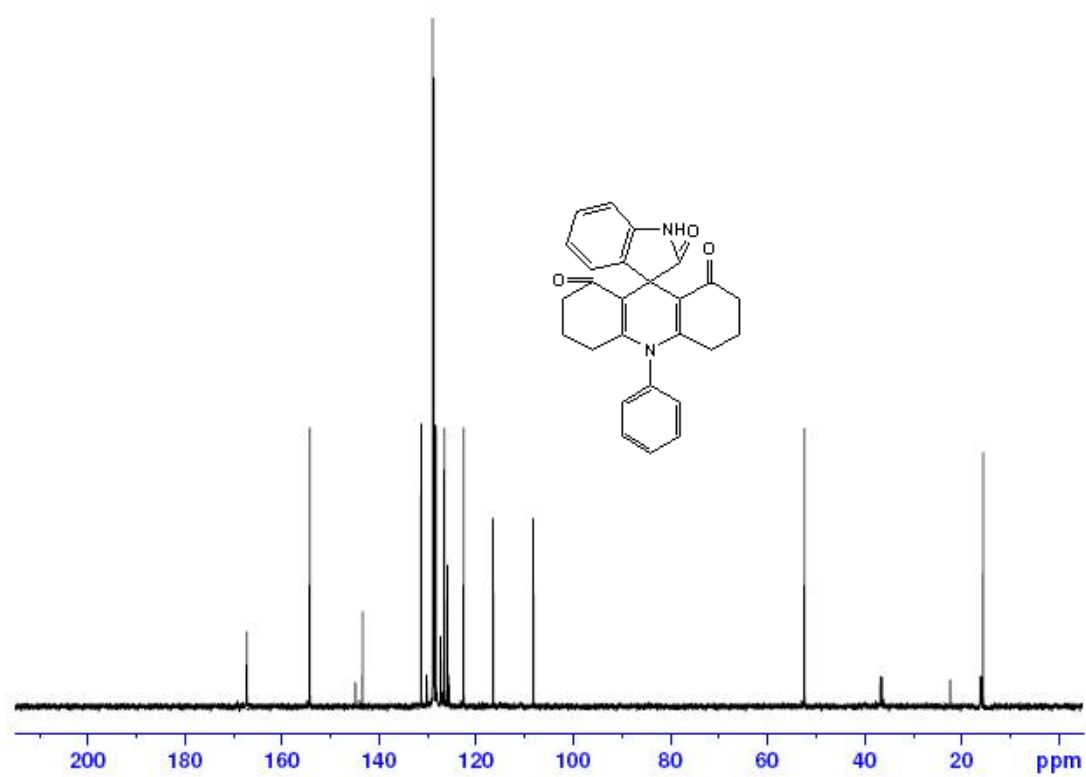

$^{13}\text{C}$ -NMR

Compound-1b

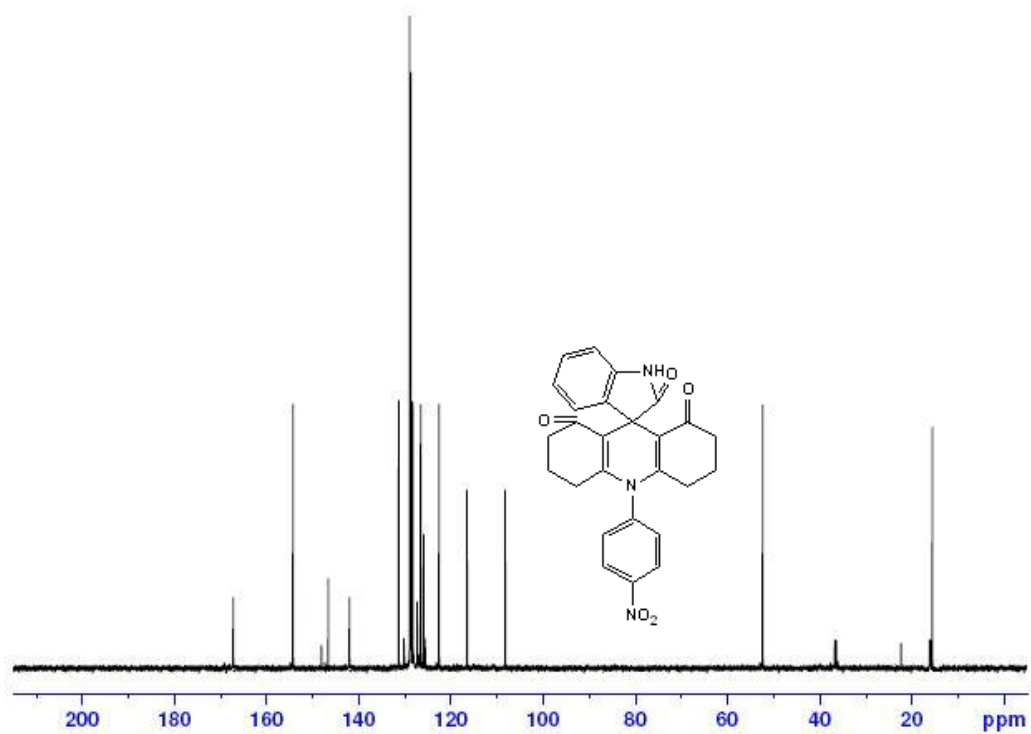

$^{13}\text{C}$ -NMR

Compound-1c

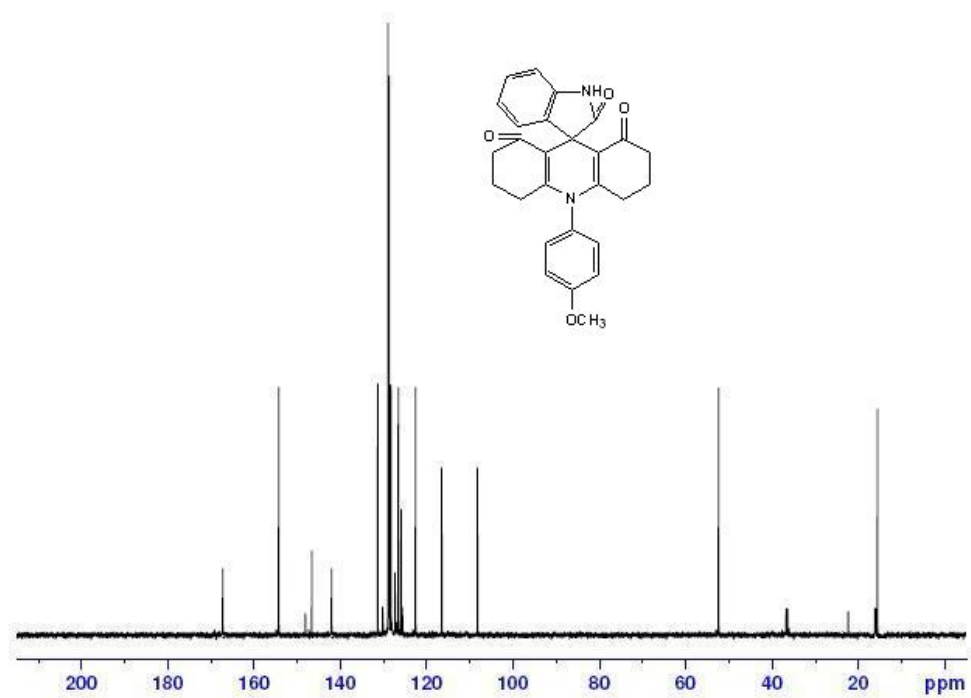

$^{13}\text{C}$ -NMR

Compound-1d

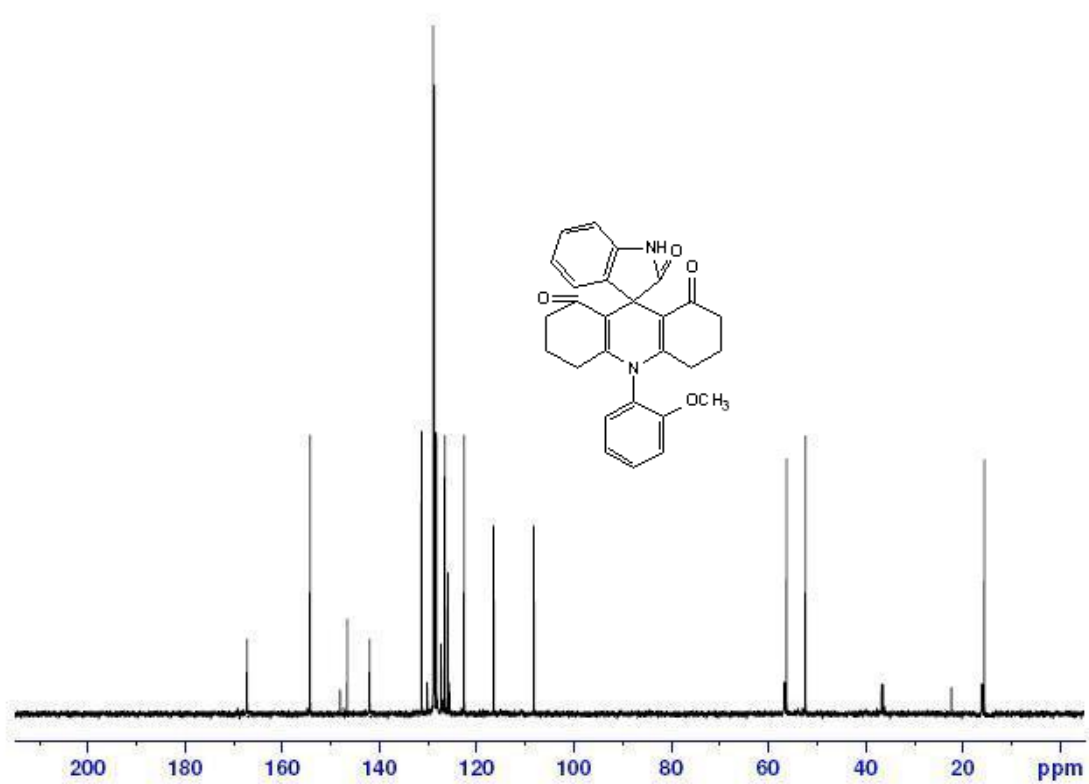

$^{13}\text{C}$ -NMR

Compound-1e

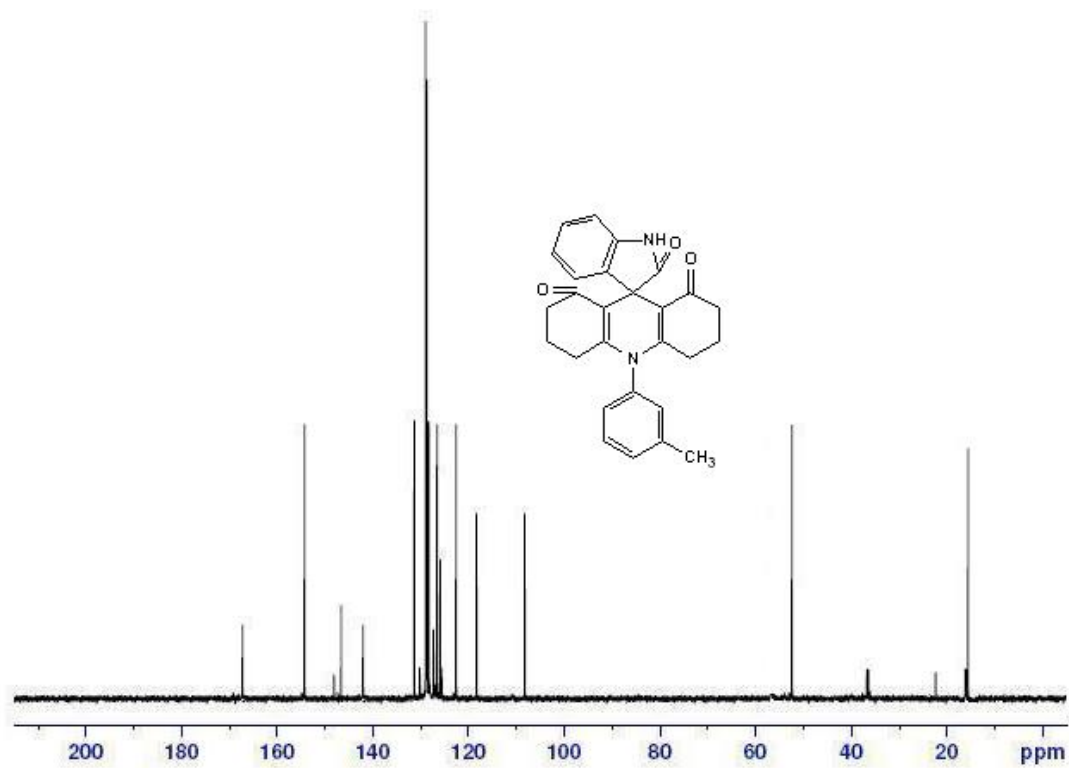



$^{13}\text{C}$ -NMR

Compound-1f

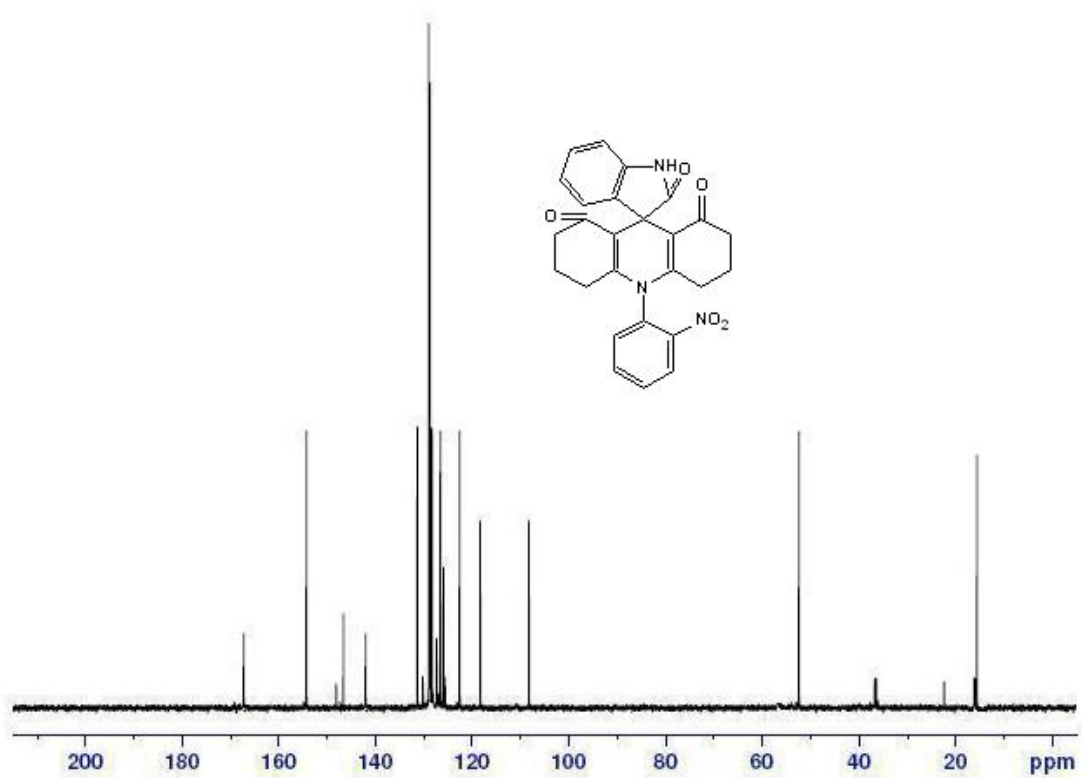

<sup>13</sup>C-NMR

Compound-1g

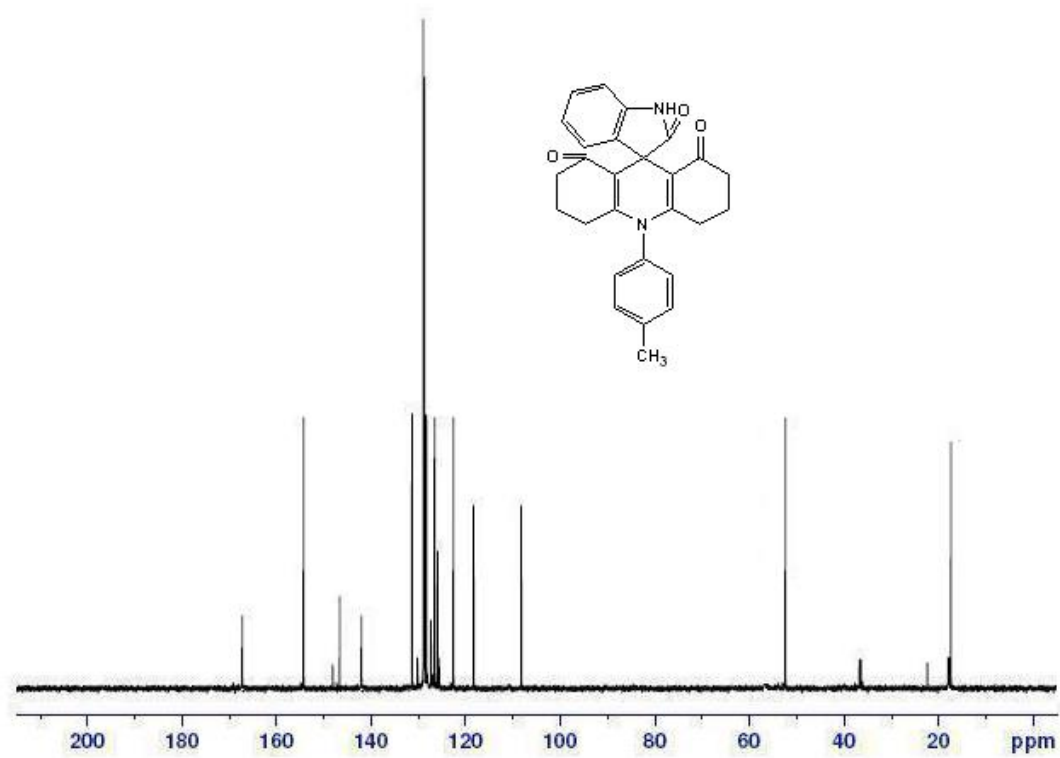

$^{13}\text{C}$ -NMR

Compound-1h

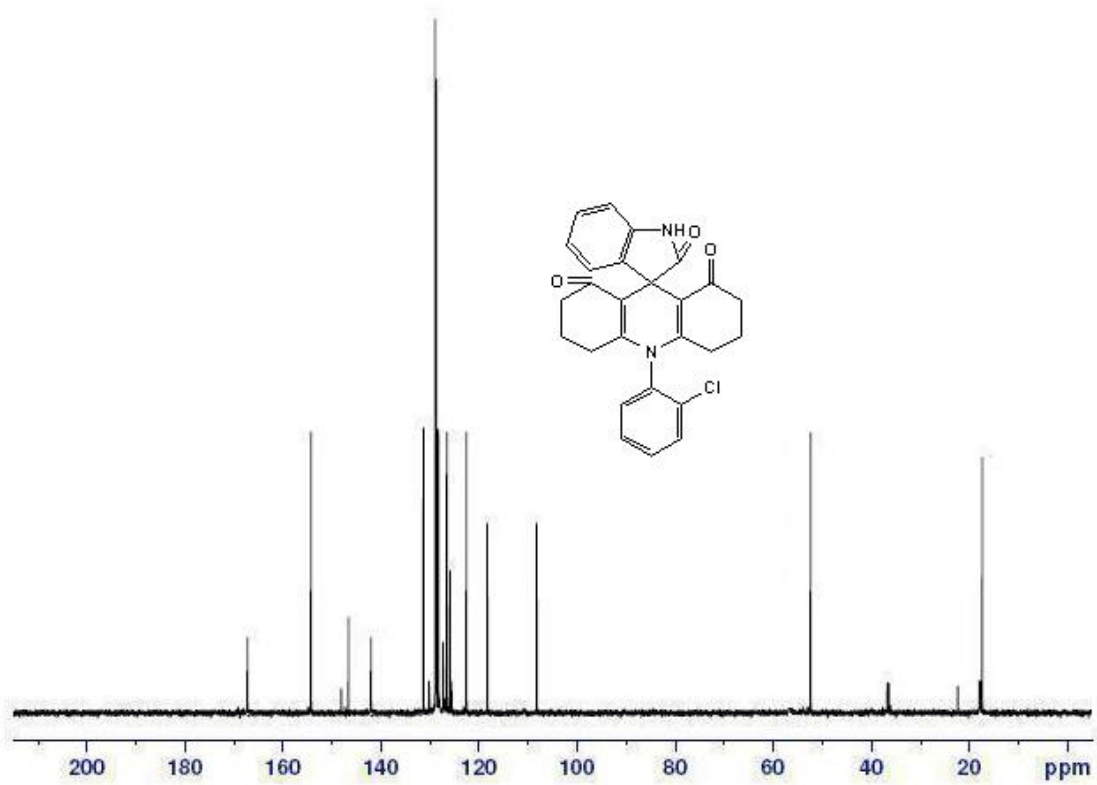

<sup>13</sup>C-NMR

Compound-1i

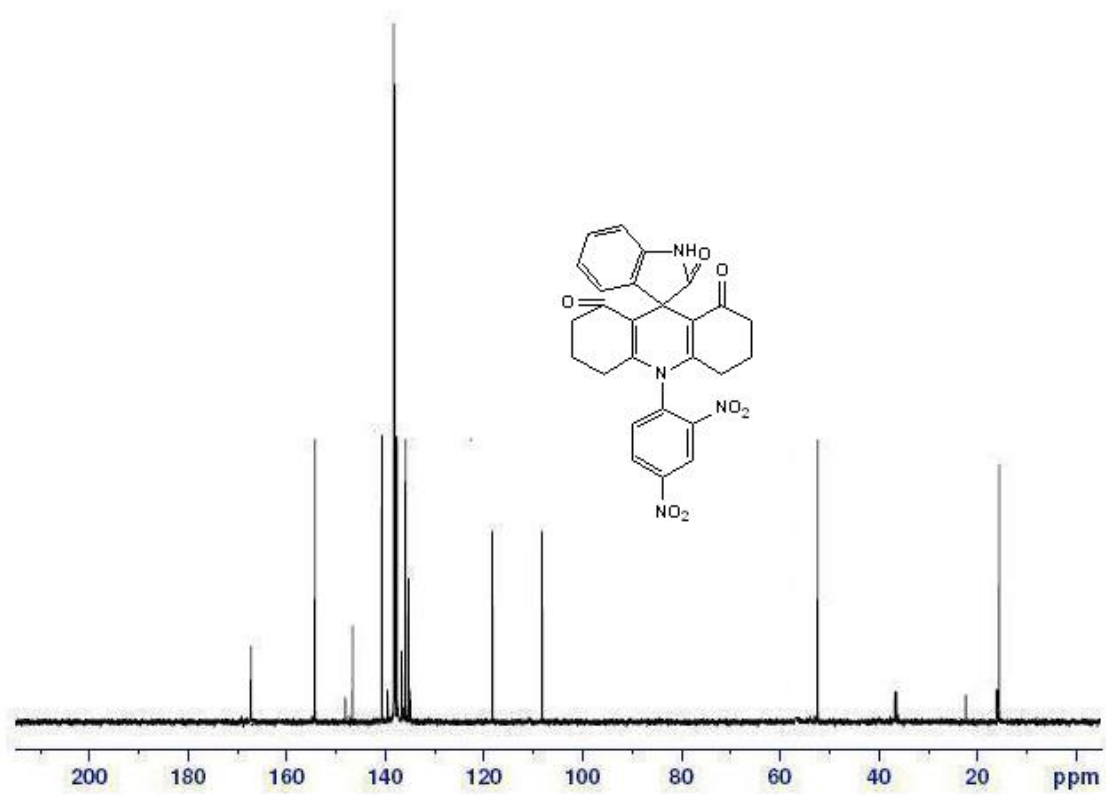

$^{13}\text{C}$ -NMR

Compound-1j

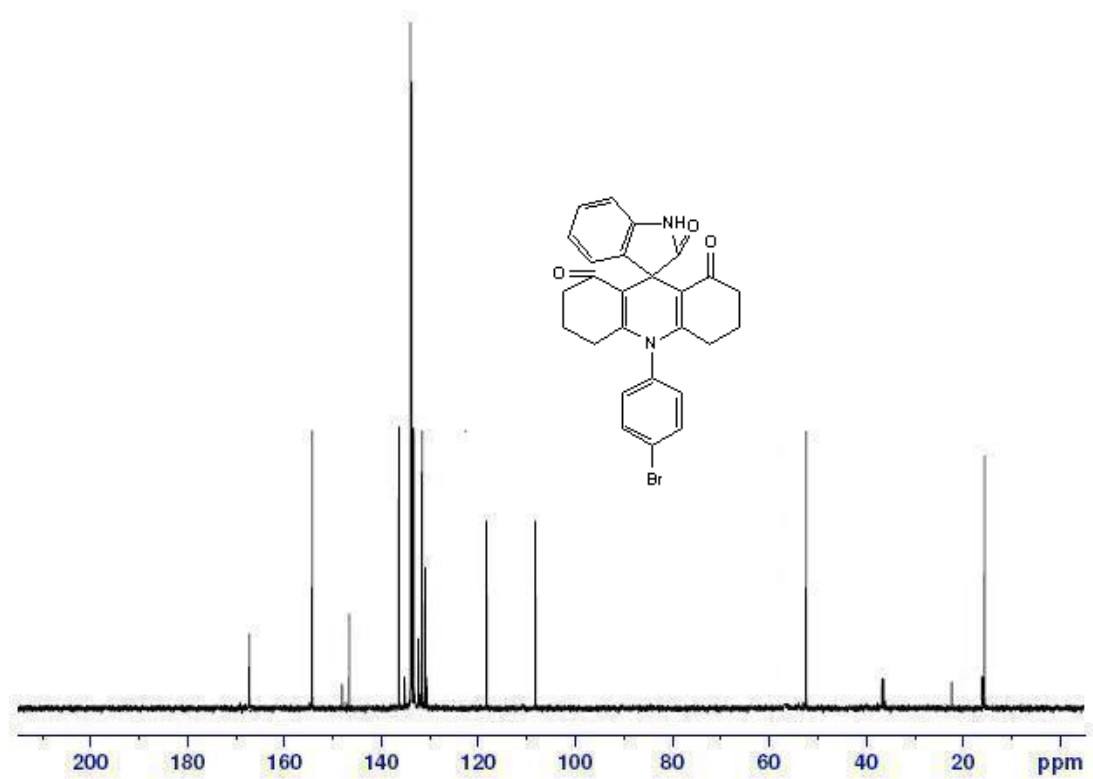

Supplement: s1 [file s1]
